# Supplementary material for: Transcriptome change of Staphylococcus aureus in infected mouse liver
Source: PubMed Central journal article supplement (PMC9300722; doi:10.1038/s42003-022-03674-5), 2022-07-20
Supplement: 42003_2022_3674_MOESM2_ESM.pdf [file 42003_2022_3674_MOESM2_ESM.pdf]

## Supplementary information

### Transcriptome change of *Staphylococcus aureus* in infected mouse liver

Hiroshi Hamamoto<sup>1,#</sup>, Suresh Panthee<sup>2,3#</sup>, Atmika Paudel<sup>4</sup>, Suguru Ohgi<sup>5,6</sup>, Yutaka Suzuki<sup>7</sup>, Koichi Makimura<sup>1</sup>, Kazuhisa Sekimizu<sup>2,\*</sup>

<sup>1</sup> Teikyo University Institute of Medical Mycology, 359 Otsuka, Hachio-ji shi, Tokyo, 192-0395, Japan

<sup>2</sup> Drug Discoveries by Silkworm Models, Faculty of Pharma-Science, Teikyo University, 359 Otsuka, Hachio-ji shi, Tokyo, 192-0395, Japan

<sup>3</sup> Current address: GenEndeavor LLC, 26219 Eden Landing Rd, Hayward, CA, 94545

<sup>4</sup> International Institute for Zoonosis Control, Hokkaido University, North 20, West 10, Kita-ku, Sapporo Hokkaido 001-0020, Japan

<sup>5</sup> Laboratory of Microbiology, Graduate School of Pharmaceutical Sciences, The University of Tokyo, 7-3-1 Hongo, Bunkyo-ku, Tokyo 111-0033, Japan

<sup>6</sup> Current address: Kyowa Kirin Co., Ltd., 1-9-2 Otemachi, Chiyoda-ku, Tokyo 100-0004, Japan

<sup>7</sup> Department of Computational Biology and Medical Sciences, Graduate School of Frontier Sciences, The University of Tokyo, 5-1-5 Kashiwanoha, Kashiwa shi, Chiba, 277-8562, Japan

Corresponding Author:

\* To whom correspondence should be addressed (sekimizu@main.teikyo-u.ac.jp)

# These authors equally contributed to this study

| Sample Origin                           | in liver    |            |             |             |            |             |             |            |            | <i>in vitro</i> |            |            |            |
|-----------------------------------------|-------------|------------|-------------|-------------|------------|-------------|-------------|------------|------------|-----------------|------------|------------|------------|
|                                         | 6 h.p.i.    |            |             | 24 h.p.i.   |            |             | 48 h.p.i.   |            |            | TSB             |            |            |            |
| Sample name                             | No.3        | No.23      | No.33       | No.3        | No.13      | No.83       | L10-2       | L10-3      | D2-3       | NMWT-1          | NMWT-2     | MMWT-3     | NMWT-4     |
| cells in the sample (x10 <sup>3</sup> ) | 1,484       | 1,300      | 1,162       | 503         | 143        | 753         | 3,580       | 5,001      | 3,561      |                 |            |            |            |
| Total reads                             | 178,491,141 | 98,324,305 | 179,892,351 | 105,370,467 | 88,463,592 | 106,305,171 | 104,816,965 | 93,625,792 | 89,721,859 | 19,256,012      | 19,700,338 | 25,971,088 | 44,444,034 |
| Mapped reads                            | 328,107     | 526,721    | 237,715     | 534,170     | 404,538    | 576,442     | 980,823     | 1,149,746  | 249,904    | 16,519,511      | 16,578,709 | 22,522,546 | 33,925,903 |
| Uniquely mapped reads                   | 300,156     | 485,379    | 215,196     | 423,322     | 315,772    | 489,315     | 707,532     | 533,073    | 161,085    | 587,376         | 5,596,383  | 7,368,820  | 4,030,565  |
| Non-specifically mapped reads           | 27,951      | 41,342     | 22,519      | 110,848     | 88,766     | 87,127      | 273,291     | 616,673    | 88,819     | 10,629,133      | 10,982,326 | 15,153,726 | 29,895,338 |
| The genes not read mapped               | 374 (12%)   |            |             | 269 (9.0%)  |            |             | 14 (0.47%)  |            |            | 97 (3.2%)       |            |            |            |

**Supplementary Table 1** | Summary of *in vivo* RNA-Seq results of *S. aureus* in infected mouse liver

| gene           | category                       | function                                                  | 6 h.p.i. |            | 24 h.p.i. |            | 48 h.p.i. |            |
|----------------|--------------------------------|-----------------------------------------------------------|----------|------------|-----------|------------|-----------|------------|
|                |                                |                                                           | Fold     | FDR p-val. | Fold      | FDR p-val. | Fold      | FDR p-val. |
| <i>Trf</i>     | Metal sequestration            | transferrin                                               | 1.4      | 1.000      | -1.0      | 1.000      | 3.6       | 0.017      |
| <i>Ltf</i>     |                                | lactotransferrin                                          | 23.7     | 0.029      | 32.7      | 0.002      | 407.1     | <0.001     |
| <i>Lcn2</i>    |                                | lipocalin 2                                               | 162.2    | <0.001     | 349.7     | <0.001     | 861.9     | <0.001     |
| <i>Hamp</i>    |                                | hepcidin antimicrobial peptide                            | -1.6     | 0.802      | -2.1      | 0.713      | 1.3       | 1.000      |
| <i>Tlr2</i>    | Innate immunity                | toll-like receptor 2                                      | 140      | <0.001     | 8.4       | <0.001     | 8.0       | <0.001     |
| <i>Myd88</i>   |                                | myeloid differentiation primary response gene 88          | 7.1      | <0.001     | 2.3       | 0.037      | 3.6       | 0.001      |
| <i>Saa3</i>    |                                | serum amyloid A 3                                         | 370      | <0.001     | 840       | <0.001     | 3300      | <0.001     |
| <i>Nos2</i>    |                                | nitric oxide synthase 2, inducible                        | 234      | <0.001     | 200       | <0.001     | 610       | <0.001     |
| <i>mt-Cytb</i> | Respiratory electron transport | mitochondrially encoded cytochrome b                      | -17      | <0.001     | -10       | <0.001     | -21       | <0.001     |
| <i>Uqcrcq</i>  |                                | ubiquinol-cytochrome c reductase, complex III subunit VII | -1.8     | 0.661      | -3.9      | 0.001      | -16       | <0.001     |
| <i>mt-ND4l</i> |                                | mitochondrially encoded NADH dehydrogenase 4L             | -15      | <0.001     | -5.5      | <0.001     | -18       | <0.001     |
| <i>Hilpda</i>  | Hypoxia                        | hypoxia inducible lipid droplet associated                | 2.3      | 0.440      | 5.3       | 0.002      | 11.7      | <0.001     |
| <i>Hif1a</i>   |                                | hypoxia inducible factor 1, alpha subunit                 | 1.3      | 1.000      | 1.4       | 0.835      | 4.1       | <0.001     |
| <i>Hif3a</i>   |                                | hypoxia inducible factor 3, alpha subunit                 | -4.1     | 0.175      | 8.1       | 0.001      | 4.0       | 0.157      |

**Supplementary Table 2** | Gene expression change in representative genes in *S. aureus*-infected mice compared with PBS-injected mice.

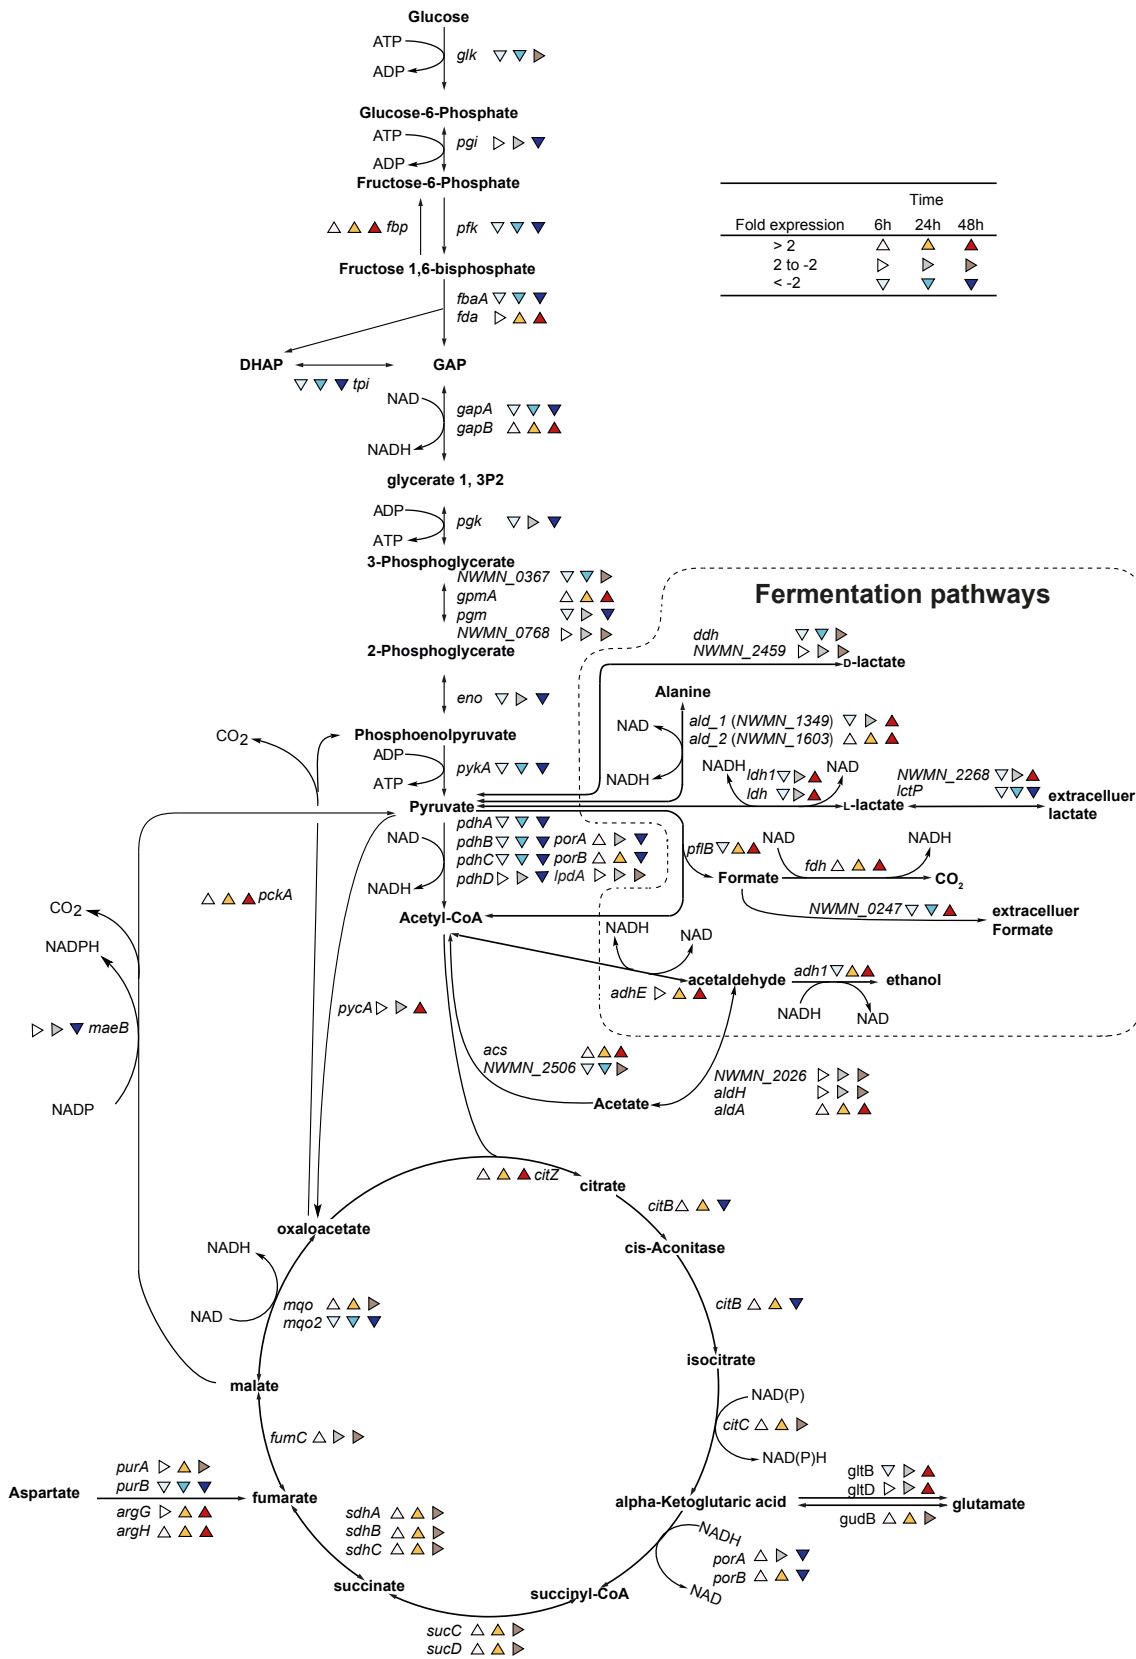

**Supplementary Figure 1** | Gene expression changes related to glycolysis and the TCA cycle in infected mouse liver compared with culture medium

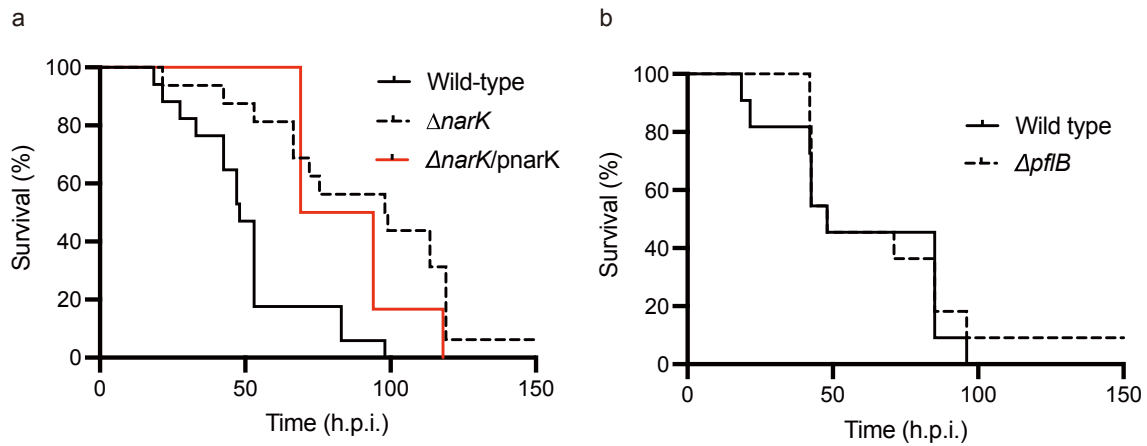

**Supplementary Figure 2** | Mouse-killing ability of a disruption mutant of the *narK* and *pflB* gene involved in anaerobic metabolism

**a**, Survival curves of mice injected with wild-type, *narK* gene-disrupted strains, and the  $\Delta narK/narK$  complement strain via tail vein. For the wild-type and  $\Delta narK$  strains, the results of 3 independent experiments were combined (wild-type:  $6.0 \times 10^7$ ,  $4.3 \times 10^7$  and  $3.7 \times 10^7$  n=17,  $\Delta narK$ :  $6.0 \times 10^7$ ,  $4.6 \times 10^7$  and  $3.9 \times 10^7$  n=16, respectively) and for the  $\Delta narK/pnarK$  strain, a single experiment was performed ( $4.8 \times 10^7$  CFU n=6). Statistical analysis was performed by the log-rank test ( $p=0.0003$  chi square=13.72, df=1 between WT and  $\Delta narK$  strain, and  $p=0.2635$  chi square=1.250, df=1 between the  $\Delta narK/pnarK$  and  $\Delta narK$  strains). **b**, Parent and  $\Delta pflB$  strains were intravenously injected. The combined results of 2 independent experiments are shown (n=11). Injection doses were  $3.8 \times 10^7$  and  $4.7 \times 10^7$  CFU for the wild-type, and  $3.2 \times 10^7$  and  $4.5 \times 10^7$  CFU for the mutant. No significant difference was detected by log-rank test ( $p=0.6644$ , chi square=0.1882, df=1).

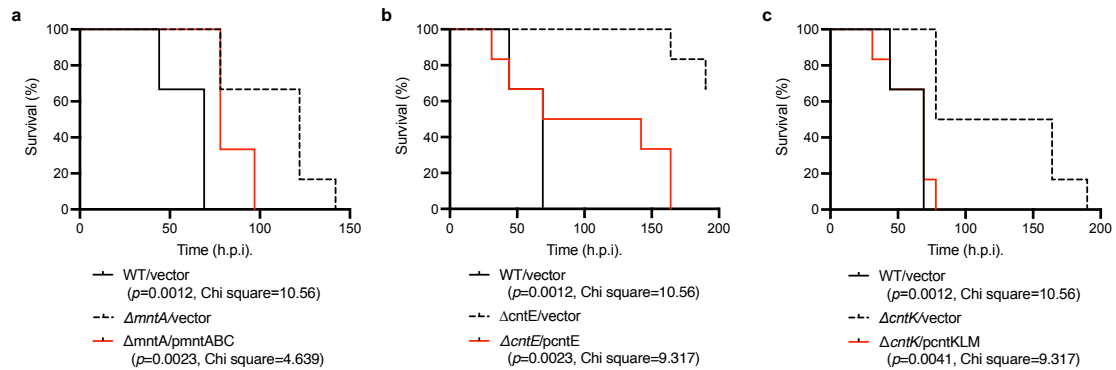

### Supplementary Figure 3 | Recovery of virulence by gene complementation

Comparison of mouse-killing ability between gene-disrupted mutants,  $\Delta mntA$  (a),  $\Delta cntE$  (b), and  $\Delta cntK$  (c) and their gene-complemented strains. Bacterial suspensions were intravenously injected. Injection doses were  $5.6 \times 10^7$  CFU for the wild-type (WT)/vector strain,  $5.9 \times 10^7$  CFU for the  $\Delta mntA$ /vector,  $5.9 \times 10^7$  CFU for  $\Delta mntA$ /pmntABC,  $6.1 \times 10^7$  CFU for the  $\Delta cntE$ /vector,  $5.7 \times 10^7$  CFU for  $\Delta cntE$ /pcntE,  $5.6 \times 10^7$  CFU for the  $\Delta cntK$ /vector, and  $4.4 \times 10^7$  CFU for  $\Delta cntK$ /pcntKLM. The displayed statistical analyses were performed by the Log-rank (Mantel-Cox) test against disruptant mutant with vector ( $n=6$  in each group and all  $df=1$ ).

| Gene disruption or plasmid construction | Primer name     | Sequence (5'→3')                  |
|-----------------------------------------|-----------------|-----------------------------------|
| <i>pflB</i>                             | 0162_F          | GTGTCCCTTAAGCATAGT                |
|                                         | 0162_R          | CAGATGGAGGCGTTTAGT                |
| <i>mntA</i>                             | 0603_F          | CTACAGTCAGTGCTACTC                |
|                                         | 0603_R          | TGGTGCTGGTAAATCTTC                |
| <i>narK</i>                             | 2288_F          | TTTTTGTCGACCTACGTTCTTGTGTGTCACC   |
|                                         | 2288_R          | TTTTTGGATCCGTTTAGTGGTTGGGTTTATGG  |
| <i>cntE</i>                             | 2359_F          | TTTTTGTCGACCGCGATAGCCAAAGAATCT    |
|                                         | 2359_R          | TTTTTGGATCCCTTGGCCCTTTTGAGAT      |
| <i>cntK</i>                             | 2367_F          | ACTAAATACTGCCCCCT                 |
|                                         | 2367_R          | ATGCATCTATCGCCAATC                |
| pmntABC                                 | 0603_Fw_Hiind   | ATATAAGCTTTTATGTTGATGTGTGGCCT     |
|                                         | 0603_Rev_BamH   | AATTGGATCCACGTCCTACCATTTCACT      |
| pnarK                                   | narK_Fw_Eco     | CCGGAATTCCCTCCTTATGTTGTCAGC       |
|                                         | narK_Rev_Hind   | CGCAAGCTTCCATTACCTTGCCTAAAATC     |
| pcntE                                   | cntE_Fw_Eco     | CGCGGATCCATGAAAGGTGCAATGGCTTGGCC  |
|                                         | cntE_Rev_sall   | CCGGTCGACTTAAAGACTACTCGCTGGACGTGG |
| pcntLMK                                 | cntLMK_Fw_Hind  | ATATAAGCTTCAACCAGTTAAAATTAGCCC    |
|                                         | cntLMK_Rev_BamH | AATTGGATCCGTAGAGCCACAAGAAGCAA     |

**Supplementary Table 3** | Primers used in this study

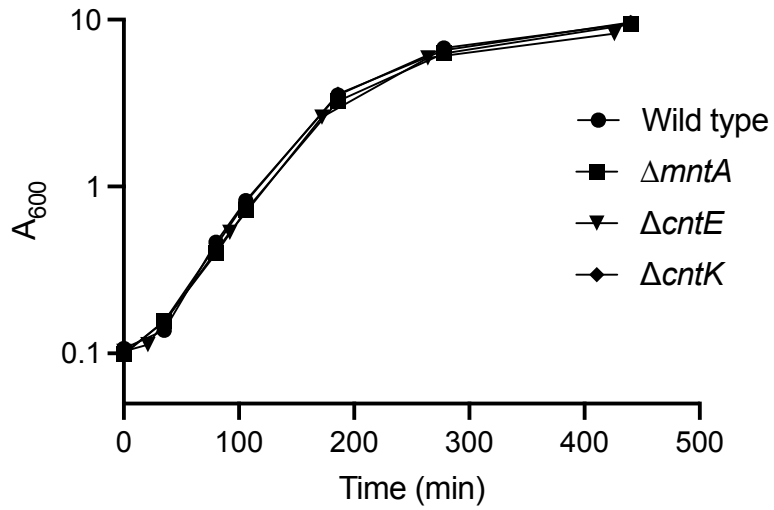

**Supplementary Figure 4| Growth curve of gene-disruptant mutants used in this study**

Full growth cultured cells were diluted 100-times in TSB medium and absorbance at 600 nm was monitored by a photometer. Representative data of 2 independent experiments with similar results are shown.
