# Supplementary material for: Transcriptome change of Staphylococcus aureus in infected mouse liver
Source: PubMed Central journal article supplement (PMC9300722; doi:10.1038/s42003-022-03674-5), 2022-07-20
Supplement: 42003_2022_3674_MOESM3_ESM.pdf [file 42003_2022_3674_MOESM3_ESM.pdf]

## Description of Additional Supplementary Files

**File name:** Supplementary Data 1

**Description:** in vivo RNA-Seq results of *S. aureus* in infected mouse liver.

**File name:** Supplementary Data 2

**Description:** Gene expression change in liver of mice after *S. aureus* infection compared with PBS treated mice.

**File name:** Supplementary Data 3

**Description:** Reactome analysis of genes upregulated or downregulated after *S. aureus* infection.

**File name:** Supplementary Data 4

**Description:** The source data behind the graphs in the paper.
